# Supplementary material
Source: PubMed Central journal article supplement (PMC5567990)
Supplement: NIHMS887811-supplement-Supplemental_1.pdf [file NIHMS887811-supplement-Supplemental_1.pdf]

## **Supporting Information:**

### **Analogs of the ATP-Sensitive Potassium ( $K_{ATP}$ ) Channel Opener Cromakalim with in Vivo Ocular Hypotensive Activity**

**Uttio Roy Chowdhury, Kimberly B. Viker, Kristen L. Stoltz, Bradley H. Holman, Michael P. Fautsch, Peter I. Dosa**

**S2:** Synthesis of Compounds ( $\pm$ )-1, ( $\pm$ )-2, and (-)-2.

**S4:** Table S1, Effect of Compounds (3*S*,4*R*)-2, ( $\pm$ )-2, and ( $\pm$ )-4 on IOP in Mice.

**S5:** Crystal Structure Report for Compound 14

## Synthesis of Compounds (±)-1 and (±)-2

**(±)-Dibenzyl ((3*S*,4*R*)-6-cyano-2,2-dimethyl-4-(2-oxopyrrolidin-1-yl)chroman-3-yl) phosphate [(±)-1].** To a stirred suspension of racemic cromakalim (50 mg, 0.175 mmol) in CH<sub>2</sub>Cl<sub>2</sub> (5 mL) was added 0.45 M tetrazole in acetonitrile (3.9 mL, 1.76 mmol) followed by dibenzyl *N,N*-dimethylphosphoramidite (0.200 mL, 0.75 mmol). The reaction mixture was stirred at rt for 2.5 h. After cooling the mixture in an ice bath, THF (5 mL) was added, followed by dropwise addition of 30% H<sub>2</sub>O<sub>2</sub> (1 mL). After stirring for 5 min., saturated aqueous Na<sub>2</sub>S<sub>2</sub>O<sub>3</sub> (30 mL) was added slowly. The mixture was diluted with water (50 mL) and extracted with CH<sub>2</sub>Cl<sub>2</sub> (2 x 50 mL). The combined organic layers were dried (Na<sub>2</sub>SO<sub>4</sub>), filtered, and concentrated under reduced pressure. Purification by flash chromatography (35% ethyl acetate/hexanes) on silica gel followed by a second flash chromatography (60% ethyl acetate/hexanes) on silica gel furnished 89.8 mg product (94% yield) as a clear colorless oil. <sup>1</sup>H NMR (400 MHz, CDCl<sub>3</sub>): 7.47 (dd, *J* = 8.5, 1.5 Hz, 1H), 7.39-7.31 (m, 10H), 7.26 (s, 1H), 6.90 (d, *J* = 8.6 Hz, 1H), 5.55 (d, *J* = 9.9 Hz, 1H), 5.10-4.96 (m, 4H), 4.60 (dd, *J* = 9.9 Hz, *J*<sub>31P</sub> = 10 Hz, 1H), 3.55-3.46 (m, 1H), 2.93-2.83 (m, 1H), 2.51-2.39 (m, 1H), 2.35-2.23 (m, 1H), 2.02-1.89 (m, 2H), 1.51 (s, 3H), 1.28 (s, 3H). LC/MS calculated for C<sub>30</sub>H<sub>31</sub>N<sub>2</sub>O<sub>6</sub>P+ H<sup>+</sup>, 547.2; observed 547.8.

**(±)-Sodium (3*S*,4*R*)-6-cyano-2,2-dimethyl-4-(2-oxopyrrolidin-1-yl)chroman-3-yl phosphate [(±)-2].** To a solution of (±)-1 (65.5 mg, 0.120 mmol) in dry CH<sub>2</sub>Cl<sub>2</sub> (3 mL) was added TMSBr (53 μL, 0.40 mmol) by syringe. After stirring for 6 h, the reaction mixture was concentrated under reduced pressure. The resulting residue was purified by chromatography (0% acetonitrile/20 mM triethylammonium acetate buffer to 100% acetonitrile, C<sub>18</sub> column) to yield 53.5 mg white solid after lyophilization. To prepare the sodium salt of (±)-2, a 1 cm wide column was filled with 12 cm of DOWEX 50W2 (50-100 mesh, strongly acidic) ion exchange resin. The column was prepared by sequentially washing with 1:1 acetonitrile/water, 1M aqueous NaHCO<sub>3</sub> (lots of gas evolution), water, and then finally 1:1 acetonitrile/water. The reaction product was dissolved in 1:1 acetonitrile/water and loaded onto the column, which was eluted with 1:1 acetonitrile/water. The product containing fractions were lyophilized to furnish (±)-2 as a white solid (40.9

mg, 83% yield). <sup>1</sup>H NMR (400 MHz, D<sub>2</sub>O): 7.64 (dd, *J* = 8.6, 1.8 Hz, 1H), 7.47 (bs, 1H), 7.01 (d, *J* = 8.6 Hz, 1H), 5.27 (d, *J* = 9.8 Hz, 1H), 4.46 (dd, *J* = 10.0, *J*<sub>31P</sub> = 10 Hz, 1H), 3.68-3.56 (m, 1H), 3.21-3.07 (m, 1H), 2.68-2.52 (m, 2H), 2.22-1.99 (m, 2H), 1.59 (s, 3H), 1.32 (s, 3H).

**Sodium (3*R*,4*S*)-6-cyano-2,2-dimethyl-4-(2-oxopyrrolidin-1-yl)chroman-3-yl phosphate [(-)-2].**

Compound (-)-**2** was synthesized from dexchromakalim using the same sequence of synthetic steps used to synthesize (±)-**2** from cromakalim. <sup>1</sup>H NMR (400 MHz, D<sub>2</sub>O): 7.64 (dd, *J* = 8.6, 1.7 Hz, 1H), 7.45 (bs, 1H), 7.00 (d, *J* = 8.6 Hz, 1H), 5.23 (d, *J* = 10.2 Hz, 1H), 4.42 (dd, *J* = 10, *J*<sub>31P</sub> = 10 Hz, 1H), 3.76-3.65 (m, 1H), 3.19-3.06 (m, 1H), 2.73-2.50 (m, 2H), 2.23-1.98 (m, 2H), 1.60 (s, 3H), 1.32 (s, 3H). [ $\alpha$ ]<sub>D</sub><sup>22</sup> -24.6 (*c* 0.35, H<sub>2</sub>O).

Table S1, Effect of Compounds (3*S*,4*R*)-**2**, (±)-**2**, and (±)-**4** on IOP in Mice.

| Prodrugs                            | IOP (mm Hg)                 |                         |                    |                         |
|-------------------------------------|-----------------------------|-------------------------|--------------------|-------------------------|
|                                     | Right eye (vehicle control) |                         | Left eye (treated) |                         |
|                                     | Baseline                    | After vehicle treatment | Baseline           | After prodrug treatment |
| (3 <i>S</i> ,4 <i>R</i> )- <b>2</b> | 15.77 ± 0.38                | 16.25 ± 0.19            | 15.81 ± 0.38       | 13.11 ± 0.5             |
| (±)- <b>4</b>                       | 16.24 ± 0.14                | 16.41 ± 0.12            | 16.20 ± 0.43       | 14.60 ± 0.51            |
| (±)- <b>2</b>                       | 16.38 ± 0.30                | 16.63 ± 0.06            | 16.53 ± 0.21       | 14.13 ± 0.22            |

## Crystal Structure Report for Compound 14

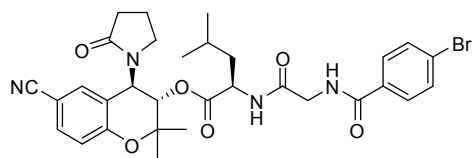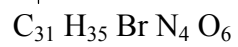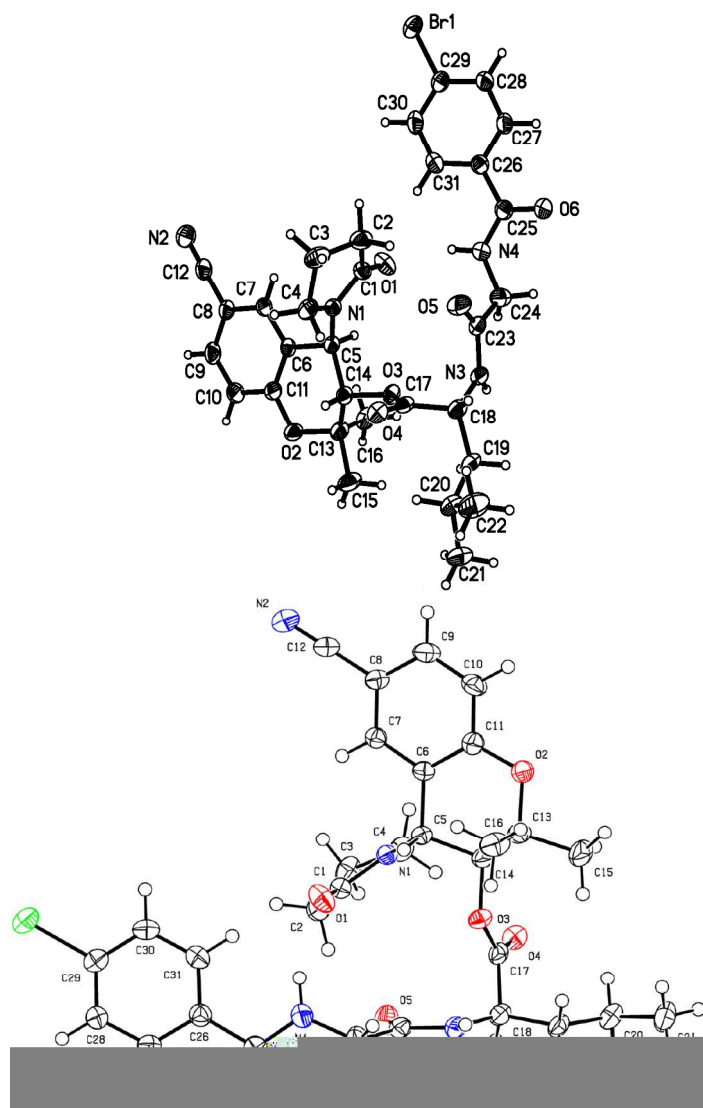

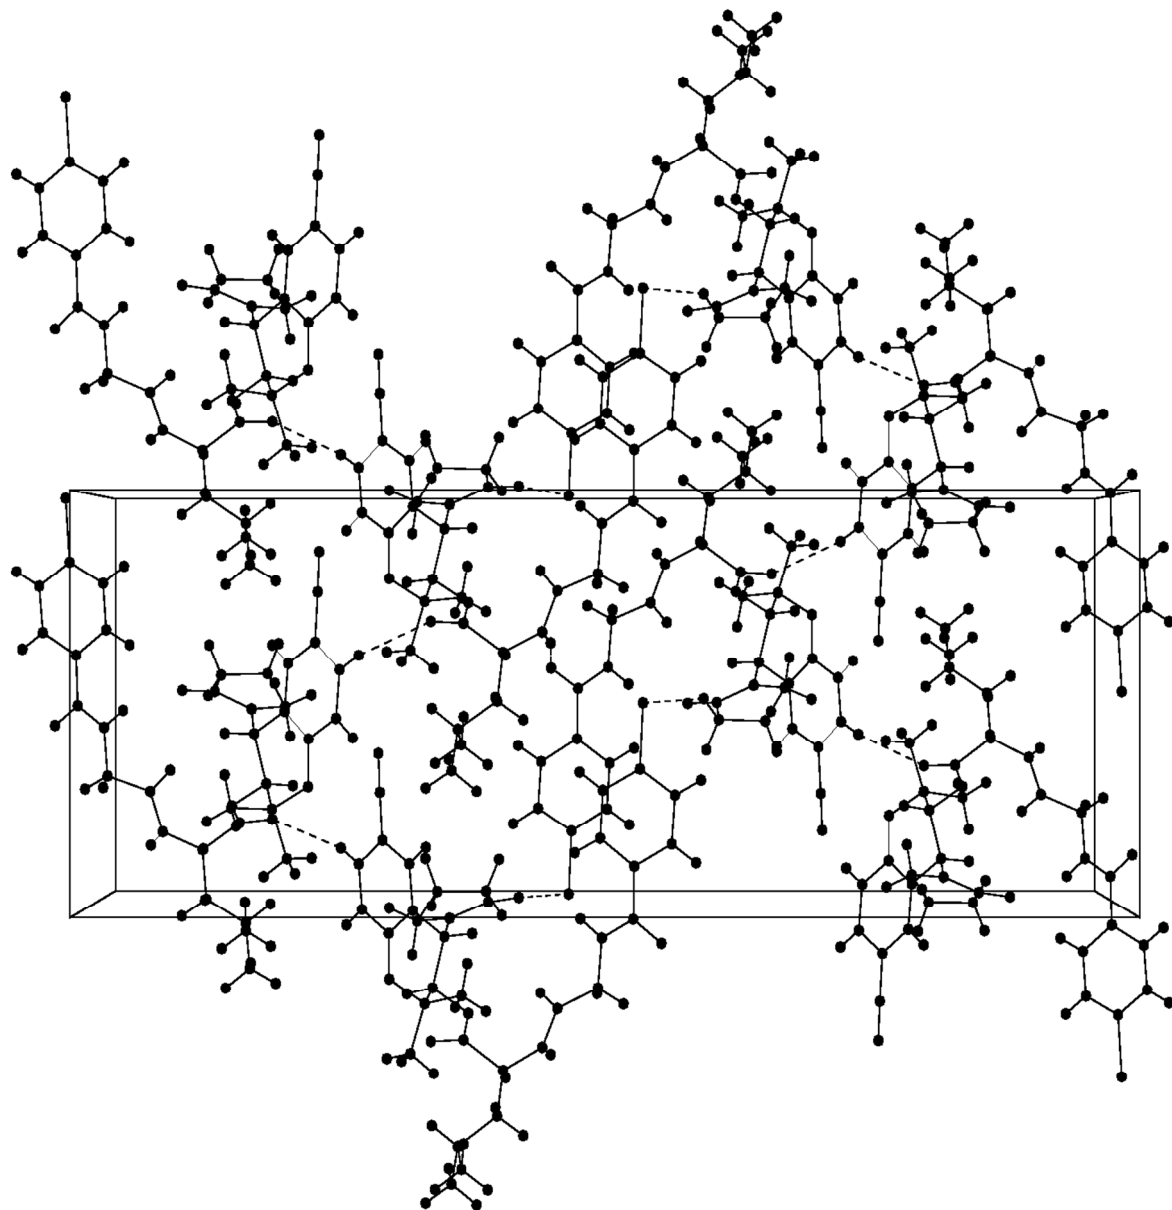

### Data collection

A crystal (approximate dimensions 0.180 x 0.180 x 0.045 mm<sup>3</sup>) was placed onto the tip of a 0.1 mm diameter glass capillary and mounted on a Bruker Photon-100 CMOS diffractometer for a data collection at 123(2) K.<sup>1</sup> A preliminary set of cell constants was calculated from reflections harvested from three sets of frames. These initial sets of frames were oriented such that orthogonal wedges of reciprocal space were surveyed. This produced an initial orientation matrix determined from 231 reflections. The data collection was carried out using CuK $\alpha$  radiation (parabolic mirrors) with a frame time of 10 seconds and a detector distance of 4.0 cm. A strategy program was used to assure complete coverage of all unique data to a resolution of 0.83 Å. All major sections of frames were collected with 0.80° steps in  $\omega$  or  $\phi$  at different detector positions in  $2\theta$ . The intensity data were corrected for absorption and decay (SADABS).<sup>2</sup> Final cell constants were calculated from 2710 strong reflections from the actual data collection after integration (SAINT).<sup>3</sup> Please refer to Table 1 for additional crystal and refinement information.

### Structure solution and refinement

The structure was solved using SHELXS-97 (Sheldrick 2008)<sup>4</sup> and refined using SHELXL-2013 (Sheldrick 2013).<sup>4</sup> The space group P2<sub>1</sub>2<sub>1</sub>2<sub>1</sub> was determined based on systematic absences and intensity statistics. A direct-methods solution was calculated which provided most non-hydrogen atoms from the E-map. Full-matrix least squares / difference Fourier cycles were performed which located the remaining non-hydrogen atoms. All non-hydrogen atoms were refined with anisotropic displacement parameters. All hydrogen atoms were placed in ideal positions and refined as riding atoms with relative isotropic displacement parameters. The final full matrix least squares refinement converged to  $R1 = 0.0240$  and  $wR2 = 0.0572$  ( $F^2$ , obs. data).

### Structure description

The structure is the one suggested. Stereochemistry found: C5=R, C14=S, and C18=R. See the CheckCIF report for additional details.

Data collection and structure solution were conducted at the X-Ray Crystallographic Laboratory, 192 Kolthoff Hall, Department of Chemistry, University of Minnesota. All calculations were performed using Pentium computers using the current SHELXTL suite of programs. All publications arising from this report MUST either 1) include Victor G. Young, Jr. as a coauthor or 2) acknowledge Victor G. Young, Jr. and the X-Ray Crystallographic Laboratory. **The Bruker-AXS D8 Venture diffractometer was purchased through a grant from NSF/MRI (#1224900) and the University of Minnesota.**

- 
- 1 APEX2, Bruker Analytical X-ray Systems, Madison, WI (2004).
  - 2 SADABS, Bruker Analytical X-ray Systems, Madison, WI (2004).
  - 3 SAINT Bruker Analytical X-ray Systems, Madison, WI (2004).
  - 4 SHELXTL 2013, Bruker Analytical X-Ray Systems, Madison, WI (2013); G. M. Sheldrick, *Acta Cryst.* **A64**, 112-122 (2008).

Some equations of interest:

$$R_{\text{int}} = \Sigma |F_o^2 - \langle F_o^2 \rangle| / \Sigma |F_o^2|$$

$$R_1 = \Sigma ||F_o| - |F_c|| / \Sigma |F_o|$$

$$wR2 = [\Sigma [w(F_o^2 - F_c^2)^2] / \Sigma [w(F_o^2)^2]]^{1/2}$$

$$\text{where } w = q / [\sigma^2(F_o^2) + (a*P)^2 + b*P + d + e*\sin(\theta)]$$

$$\text{Goof} = S = [\Sigma [w(F_o^2 - F_c^2)^2] / (n-p)]^{1/2}$$



Table 1. Crystal data and structure refinement for **14**.

|                                        |                                                                  |                     |
|----------------------------------------|------------------------------------------------------------------|---------------------|
| Identification code                    | 14030a                                                           |                     |
| Empirical formula                      | C <sub>31</sub> H <sub>35</sub> Br N <sub>4</sub> O <sub>6</sub> |                     |
| Formula weight                         | 639.54                                                           |                     |
| Temperature                            | 123(2) K                                                         |                     |
| Wavelength                             | 1.54178 Å                                                        |                     |
| Crystal system                         | orthorhombic                                                     |                     |
| Space group                            | P2 <sub>1</sub> 2 <sub>1</sub> 2 <sub>1</sub>                    |                     |
| Unit cell dimensions                   | $a = 7.9252(7)$ Å                                                | $\alpha = 90^\circ$ |
|                                        | $b = 11.9152(9)$ Å                                               | $\beta = 90^\circ$  |
|                                        | $c = 32.299(3)$ Å                                                | $\gamma = 90^\circ$ |
| Volume                                 | 3050.0(4) Å <sup>3</sup>                                         |                     |
| Z                                      | 4                                                                |                     |
| Density (calculated)                   | 1.393 Mg/m <sup>3</sup>                                          |                     |
| Absorption coefficient                 | 2.246 mm <sup>-1</sup>                                           |                     |
| $F(000)$                               | 1328                                                             |                     |
| Crystal color, morphology              | purple, plate                                                    |                     |
| Crystal size                           | 0.180 x 0.180 x 0.045 mm <sup>3</sup>                            |                     |
| Theta range for data collection        | 2.736 to 68.409°                                                 |                     |
| Index ranges                           | $-9 \leq h \leq 8, -14 \leq k \leq 14, -38 \leq l \leq 38$       |                     |
| Reflections collected                  | 36670                                                            |                     |
| Independent reflections                | 5592 [ $R(\text{int}) = 0.0374$ ]                                |                     |
| Observed reflections                   | 5248                                                             |                     |
| Completeness to theta = 67.679°        | 99.9%                                                            |                     |
| Absorption correction                  | multi-scan                                                       |                     |
| Max. and min. transmission             | 0.7531 and 0.5939                                                |                     |
| Refinement method                      | Full-matrix least-squares on $F^2$                               |                     |
| Data / restraints / parameters         | 5592 / 2 / 389                                                   |                     |
| Goodness-of-fit on $F^2$               | 1.066                                                            |                     |
| Final $R$ indices [ $I > 2\sigma(I)$ ] | $R1 = 0.0240, wR2 = 0.0572$                                      |                     |
| $R$ indices (all data)                 | $R1 = 0.0269, wR2 = 0.0585$                                      |                     |
| Absolute structure parameter           | -0.032(5)                                                        |                     |
| Extinction coefficient                 | n/a                                                              |                     |
| Largest diff. peak and hole            | 0.196 and -0.253 e.Å <sup>-3</sup>                               |                     |

Table 2. Atomic coordinates ( $\times 10^4$ ) and equivalent isotropic displacement parameters ( $\text{\AA}^2 \times 10^3$ ) for **14**.  $U_{\text{eq}}$  is defined as one third of the trace of the orthogonalized  $U_{ij}$  tensor.

|     | x       | y        | z       | $U_{\text{eq}}$ |
|-----|---------|----------|---------|-----------------|
| Br1 | 3103(1) | 45(1)    | -365(1) | 39(1)           |
| O1  | 4316(2) | 4800(2)  | 839(1)  | 42(1)           |
| O2  | 7415(2) | 7040(2)  | 2158(1) | 34(1)           |
| O3  | 4396(2) | 7635(1)  | 1330(1) | 26(1)           |
| O4  | 1975(2) | 8078(1)  | 1658(1) | 31(1)           |
| O5  | 1412(3) | 6873(2)  | 612(1)  | 41(1)           |
| O6  | 1748(3) | 5729(2)  | -535(1) | 38(1)           |
| N1  | 3674(2) | 5270(2)  | 1502(1) | 23(1)           |
| N2  | 7457(4) | 1412(2)  | 2266(1) | 49(1)           |
| N3  | 3208(1) | 8338(1)  | 604(1)  | 28(1)           |
| N4  | 3428(1) | 5728(1)  | 31(1)   | 36(1)           |
| C1  | 3301(3) | 4847(2)  | 1126(1) | 29(1)           |
| C2  | 1494(4) | 4466(2)  | 1128(1) | 38(1)           |
| C3  | 1004(3) | 4444(2)  | 1582(1) | 38(1)           |
| C4  | 2250(3) | 5239(2)  | 1793(1) | 31(1)           |
| C5  | 5271(3) | 5829(2)  | 1575(1) | 22(1)           |
| C6  | 6337(3) | 5262(2)  | 1902(1) | 23(1)           |
| C7  | 6369(3) | 4105(2)  | 1938(1) | 25(1)           |
| C8  | 7410(3) | 3583(2)  | 2225(1) | 29(1)           |
| C9  | 8448(4) | 4228(2)  | 2483(1) | 36(1)           |
| C10 | 8428(4) | 5376(2)  | 2449(1) | 36(1)           |
| C11 | 7374(3) | 5897(2)  | 2161(1) | 30(1)           |
| C12 | 7433(4) | 2381(2)  | 2250(1) | 35(1)           |
| C13 | 6749(4) | 7607(2)  | 1792(1) | 32(1)           |
| C14 | 5053(3) | 7064(2)  | 1688(1) | 25(1)           |
| C15 | 6513(4) | 8818(2)  | 1930(1) | 44(1)           |
| C16 | 8019(4) | 7517(2)  | 1441(1) | 40(1)           |
| C17 | 2877(3) | 8125(2)  | 1359(1) | 26(1)           |
| C18 | 2480(3) | 8820(2)  | 975(1)  | 28(1)           |
| C19 | 3197(3) | 10004(2) | 1038(1) | 30(1)           |
| C20 | 2521(4) | 10658(2) | 1408(1) | 36(1)           |

|     |         |          |         |       |
|-----|---------|----------|---------|-------|
| C21 | 3607(4) | 11695(2) | 1482(1) | 44(1) |
| C22 | 669(4)  | 10977(3) | 1351(1) | 52(1) |
| C23 | 2611(3) | 7355(2)  | 456(1)  | 31(1) |
| C24 | 3505(5) | 6935(2)  | 69(1)   | 42(1) |
| C25 | 2557(3) | 5214(2)  | -270(1) | 30(1) |
| C26 | 2684(3) | 3951(2)  | -280(1) | 29(1) |
| C27 | 2180(3) | 3393(2)  | -637(1) | 32(1) |
| C28 | 2282(4) | 2231(2)  | -668(1) | 33(1) |
| C29 | 2890(3) | 1629(2)  | -336(1) | 31(1) |
| C30 | 3409(4) | 2162(2)  | 20(1)   | 42(1) |
| C31 | 3303(4) | 3313(2)  | 47(1)   | 41(1) |

---

Table 3. Bond lengths [Å] and angles [°] for **14**.

|         |            |          |          |
|---------|------------|----------|----------|
| Br1-C29 | 1.898(3)   | C7-H7A   | 0.9500   |
| O1-C1   | 1.229(3)   | C8-C9    | 1.400(4) |
| O2-C11  | 1.362(3)   | C8-C12   | 1.435(4) |
| O2-C13  | 1.459(3)   | C9-C10   | 1.372(4) |
| O3-C17  | 1.341(3)   | C9-H9A   | 0.9500   |
| O3-C14  | 1.440(3)   | C10-C11  | 1.398(4) |
| O4-C17  | 1.204(3)   | C10-H10A | 0.9500   |
| O5-C23  | 1.219(3)   | C13-C16  | 1.519(4) |
| O6-C25  | 1.233(3)   | C13-C15  | 1.521(4) |
| N1-C1   | 1.348(3)   | C13-C14  | 1.529(4) |
| N1-C5   | 1.450(3)   | C14-H14A | 1.0000   |
| N1-C4   | 1.470(3)   | C15-H15A | 0.9800   |
| N2-C12  | 1.155(4)   | C15-H15B | 0.9800   |
| N3-C23  | 1.350(2)   | C15-H15C | 0.9800   |
| N3-C18  | 1.448(2)   | C16-H16A | 0.9800   |
| N3-H3A  | 0.91000(7) | C16-H16B | 0.9800   |
| N4-C25  | 1.339(2)   | C16-H16C | 0.9800   |
| N4-C24  | 1.445(3)   | C17-C18  | 1.523(3) |
| N4-H4A  | 0.91000(5) | C18-C19  | 1.535(3) |
| C1-C2   | 1.502(4)   | C18-H18A | 1.0000   |
| C2-C3   | 1.518(4)   | C19-C20  | 1.524(4) |
| C2-H2A  | 0.9900     | C19-H19A | 0.9900   |
| C2-H2B  | 0.9900     | C19-H19B | 0.9900   |
| C3-C4   | 1.528(4)   | C20-C21  | 1.525(4) |
| C3-H3B  | 0.9900     | C20-C22  | 1.527(4) |
| C3-H3C  | 0.9900     | C20-H20A | 1.0000   |
| C4-H4B  | 0.9900     | C21-H21A | 0.9800   |
| C4-H4C  | 0.9900     | C21-H21B | 0.9800   |
| C5-C6   | 1.511(3)   | C21-H21C | 0.9800   |
| C5-C14  | 1.526(3)   | C22-H22A | 0.9800   |
| C5-H5A  | 1.0000     | C22-H22B | 0.9800   |
| C6-C7   | 1.383(4)   | C22-H22C | 0.9800   |
| C6-C11  | 1.395(3)   | C23-C24  | 1.522(4) |
| C7-C8   | 1.389(3)   | C24-H24A | 0.9900   |

|            |            |              |            |
|------------|------------|--------------|------------|
| C24-H24B   | 0.9900     | C28-C29      | 1.378(4)   |
| C25-C26    | 1.508(3)   | C28-H28A     | 0.9500     |
| C26-C27    | 1.389(3)   | C29-C30      | 1.376(4)   |
| C26-C31    | 1.391(4)   | C30-C31      | 1.376(4)   |
| C27-C28    | 1.390(4)   | C30-H30A     | 0.9500     |
| C27-H27A   | 0.9500     | C31-H31A     | 0.9500     |
| C11-O2-C13 | 117.40(18) | N1-C4-H4C    | 111.2      |
| C17-O3-C14 | 118.36(19) | C3-C4-H4C    | 111.2      |
| C1-N1-C5   | 120.6(2)   | H4B-C4-H4C   | 109.1      |
| C1-N1-C4   | 113.5(2)   | N1-C5-C6     | 113.36(19) |
| C5-N1-C4   | 125.29(19) | N1-C5-C14    | 112.55(19) |
| C23-N3-C18 | 119.82(15) | C6-C5-C14    | 109.10(19) |
| C23-N3-H3A | 121.71(12) | N1-C5-H5A    | 107.2      |
| C18-N3-H3A | 116.06(10) | C6-C5-H5A    | 107.2      |
| C25-N4-C24 | 122.59(16) | C14-C5-H5A   | 107.2      |
| C25-N4-H4A | 118.13(11) | C7-C6-C11    | 118.6(2)   |
| C24-N4-H4A | 118.75(12) | C7-C6-C5     | 120.9(2)   |
| O1-C1-N1   | 123.6(2)   | C11-C6-C5    | 120.4(2)   |
| O1-C1-C2   | 127.9(2)   | C6-C7-C8     | 120.9(2)   |
| N1-C1-C2   | 108.5(2)   | C6-C7-H7A    | 119.5      |
| C1-C2-C3   | 104.7(2)   | C8-C7-H7A    | 119.5      |
| C1-C2-H2A  | 110.8      | C7-C8-C9     | 120.0(3)   |
| C3-C2-H2A  | 110.8      | C7-C8-C12    | 119.6(2)   |
| C1-C2-H2B  | 110.8      | C9-C8-C12    | 120.4(2)   |
| C3-C2-H2B  | 110.8      | C10-C9-C8    | 119.6(3)   |
| H2A-C2-H2B | 108.9      | C10-C9-H9A   | 120.2      |
| C2-C3-C4   | 104.8(2)   | C8-C9-H9A    | 120.2      |
| C2-C3-H3B  | 110.8      | C9-C10-C11   | 120.1(3)   |
| C4-C3-H3B  | 110.8      | C9-C10-H10A  | 119.9      |
| C2-C3-H3C  | 110.8      | C11-C10-H10A | 119.9      |
| C4-C3-H3C  | 110.8      | O2-C11-C6    | 123.5(2)   |
| H3B-C3-H3C | 108.9      | O2-C11-C10   | 115.8(2)   |
| N1-C4-C3   | 103.0(2)   | C6-C11-C10   | 120.7(3)   |
| N1-C4-H4B  | 111.2      | N2-C12-C8    | 179.1(3)   |
| C3-C4-H4B  | 111.2      | O2-C13-C16   | 109.3(2)   |

|               |            |               |          |
|---------------|------------|---------------|----------|
| O2-C13-C15    | 104.3(2)   | C18-C19-H19B  | 108.2    |
| C16-C13-C15   | 111.5(2)   | H19A-C19-H19B | 107.3    |
| O2-C13-C14    | 107.5(2)   | C19-C20-C21   | 109.8(2) |
| C16-C13-C14   | 112.9(2)   | C19-C20-C22   | 111.7(3) |
| C15-C13-C14   | 110.9(2)   | C21-C20-C22   | 111.1(2) |
| O3-C14-C5     | 107.72(18) | C19-C20-H20A  | 108.0    |
| O3-C14-C13    | 107.14(19) | C21-C20-H20A  | 108.0    |
| C5-C14-C13    | 111.2(2)   | C22-C20-H20A  | 108.0    |
| O3-C14-H14A   | 110.2      | C20-C21-H21A  | 109.5    |
| C5-C14-H14A   | 110.2      | C20-C21-H21B  | 109.5    |
| C13-C14-H14A  | 110.2      | H21A-C21-H21B | 109.5    |
| C13-C15-H15A  | 109.5      | C20-C21-H21C  | 109.5    |
| C13-C15-H15B  | 109.5      | H21A-C21-H21C | 109.5    |
| H15A-C15-H15B | 109.5      | H21B-C21-H21C | 109.5    |
| C13-C15-H15C  | 109.5      | C20-C22-H22A  | 109.5    |
| H15A-C15-H15C | 109.5      | C20-C22-H22B  | 109.5    |
| H15B-C15-H15C | 109.5      | H22A-C22-H22B | 109.5    |
| C13-C16-H16A  | 109.5      | C20-C22-H22C  | 109.5    |
| C13-C16-H16B  | 109.5      | H22A-C22-H22C | 109.5    |
| H16A-C16-H16B | 109.5      | H22B-C22-H22C | 109.5    |
| C13-C16-H16C  | 109.5      | O5-C23-N3     | 122.4(2) |
| H16A-C16-H16C | 109.5      | O5-C23-C24    | 123.1(2) |
| H16B-C16-H16C | 109.5      | N3-C23-C24    | 114.4(2) |
| O4-C17-O3     | 124.6(2)   | N4-C24-C23    | 112.2(2) |
| O4-C17-C18    | 123.8(2)   | N4-C24-H24A   | 109.2    |
| O3-C17-C18    | 111.4(2)   | C23-C24-H24A  | 109.2    |
| N3-C18-C17    | 112.05(18) | N4-C24-H24B   | 109.2    |
| N3-C18-C19    | 109.10(18) | C23-C24-H24B  | 109.2    |
| C17-C18-C19   | 108.34(19) | H24A-C24-H24B | 107.9    |
| N3-C18-H18A   | 109.1      | O6-C25-N4     | 122.9(2) |
| C17-C18-H18A  | 109.1      | O6-C25-C26    | 121.1(2) |
| C19-C18-H18A  | 109.1      | N4-C25-C26    | 115.9(2) |
| C20-C19-C18   | 116.4(2)   | C27-C26-C31   | 117.9(2) |
| C20-C19-H19A  | 108.2      | C27-C26-C25   | 118.5(2) |
| C18-C19-H19A  | 108.2      | C31-C26-C25   | 123.6(2) |
| C20-C19-H19B  | 108.2      | C28-C27-C26   | 121.4(2) |

|              |            |              |          |
|--------------|------------|--------------|----------|
| C28-C27-H27A | 119.3      | C28-C29-Br1  | 120.7(2) |
| C26-C27-H27A | 119.3      | C29-C30-C31  | 119.6(2) |
| C29-C28-C27  | 118.8(2)   | C29-C30-H30A | 120.2    |
| C29-C28-H28A | 120.6      | C31-C30-H30A | 120.2    |
| C27-C28-H28A | 120.6      | C30-C31-C26  | 121.3(2) |
| C30-C29-C28  | 121.0(2)   | C30-C31-H31A | 119.4    |
| C30-C29-Br1  | 118.27(19) | C26-C31-H31A | 119.4    |

---

Symmetry transformations used to generate equivalent atoms:

Table 4. Anisotropic displacement parameters ( $\text{\AA}^2 \times 10^3$ ) for **14**. The anisotropic displacement factor exponent takes the form:  $-2\pi^2 [ h^2 a^{*2} U_{11} + \dots + 2 h k a^* b^* U_{12} ]$

|     | $U_{11}$ | $U_{22}$ | $U_{33}$ | $U_{23}$ | $U_{13}$ | $U_{12}$ |
|-----|----------|----------|----------|----------|----------|----------|
| Br1 | 45(1)    | 28(1)    | 44(1)    | 6(1)     | 4(1)     | 5(1)     |
| O1  | 43(1)    | 53(1)    | 29(1)    | -9(1)    | -2(1)    | -2(1)    |
| O2  | 38(1)    | 25(1)    | 41(1)    | 2(1)     | -15(1)   | -5(1)    |
| O3  | 21(1)    | 24(1)    | 32(1)    | 5(1)     | -1(1)    | 2(1)     |
| O4  | 25(1)    | 31(1)    | 38(1)    | 3(1)     | 3(1)     | 0(1)     |
| O5  | 42(1)    | 32(1)    | 50(1)    | -3(1)    | 1(1)     | -11(1)   |
| O6  | 47(1)    | 29(1)    | 37(1)    | 2(1)     | -10(1)   | 2(1)     |
| N1  | 21(1)    | 22(1)    | 26(1)    | 1(1)     | -2(1)    | -2(1)    |
| N2  | 65(2)    | 34(1)    | 48(1)    | 7(1)     | -16(1)   | 6(1)     |
| N3  | 32(1)    | 22(1)    | 32(1)    | 2(1)     | -3(1)    | -4(1)    |
| N4  | 49(2)    | 29(1)    | 31(1)    | -1(1)    | -7(1)    | -3(1)    |
| C1  | 32(1)    | 26(1)    | 30(1)    | -2(1)    | -8(1)    | 2(1)     |
| C2  | 34(2)    | 30(1)    | 51(2)    | -1(1)    | -15(1)   | -4(1)    |
| C3  | 27(2)    | 29(1)    | 59(2)    | -2(1)    | 2(1)     | -3(1)    |
| C4  | 26(1)    | 29(1)    | 36(1)    | 4(1)     | 6(1)     | -5(1)    |
| C5  | 19(1)    | 22(1)    | 25(1)    | 2(1)     | -1(1)    | -1(1)    |
| C6  | 21(1)    | 26(1)    | 23(1)    | 3(1)     | -1(1)    | 0(1)     |
| C7  | 24(1)    | 27(1)    | 24(1)    | 0(1)     | -1(1)    | 1(1)     |
| C8  | 30(1)    | 29(1)    | 28(1)    | 6(1)     | -2(1)    | 2(1)     |
| C9  | 35(2)    | 39(2)    | 32(1)    | 9(1)     | -9(1)    | 1(1)     |
| C10 | 34(2)    | 38(2)    | 34(1)    | 2(1)     | -13(1)   | -4(1)    |
| C11 | 31(1)    | 27(1)    | 31(1)    | 1(1)     | -2(1)    | -1(1)    |
| C12 | 38(2)    | 35(2)    | 31(1)    | 6(1)     | -8(1)    | 6(1)     |
| C13 | 29(1)    | 25(1)    | 41(1)    | 5(1)     | -11(1)   | -4(1)    |
| C14 | 23(1)    | 24(1)    | 28(1)    | 2(1)     | -3(1)    | 0(1)     |
| C15 | 44(2)    | 25(1)    | 64(2)    | 0(1)     | -18(2)   | -7(1)    |
| C16 | 25(1)    | 39(2)    | 55(2)    | 13(1)    | -6(1)    | -8(1)    |
| C17 | 24(1)    | 18(1)    | 36(1)    | 0(1)     | -4(1)    | -4(1)    |
| C18 | 26(1)    | 22(1)    | 36(1)    | 2(1)     | -3(1)    | 1(1)     |
| C19 | 32(1)    | 18(1)    | 40(1)    | 3(1)     | -2(1)    | -1(1)    |
| C20 | 38(2)    | 23(1)    | 46(2)    | 1(1)     | 2(1)     | 4(1)     |



|     |       |       |       |       |        |        |
|-----|-------|-------|-------|-------|--------|--------|
| C21 | 46(2) | 26(1) | 59(2) | -9(1) | -2(2)  | 2(1)   |
| C22 | 39(2) | 38(2) | 81(2) | -7(2) | 4(2)   | 5(1)   |
| C23 | 37(2) | 23(1) | 33(1) | 5(1)  | -8(1)  | -3(1)  |
| C24 | 59(2) | 32(1) | 36(1) | -4(1) | 0(1)   | -13(1) |
| C25 | 31(1) | 32(1) | 28(1) | 1(1)  | 1(1)   | -4(1)  |
| C26 | 29(1) | 30(1) | 28(1) | -1(1) | 0(1)   | 1(1)   |
| C27 | 36(2) | 32(1) | 27(1) | 4(1)  | -4(1)  | 4(1)   |
| C28 | 42(2) | 30(1) | 29(1) | -2(1) | -4(1)  | 3(1)   |
| C29 | 31(1) | 29(1) | 34(1) | 3(1)  | 4(1)   | 3(1)   |
| C30 | 57(2) | 37(2) | 32(1) | 7(1)  | -11(1) | 6(1)   |
| C31 | 57(2) | 37(2) | 29(1) | -1(1) | -11(1) | 1(2)   |

---

Table 5. Hydrogen coordinates ( $\times 10^4$ ) and isotropic displacement parameters ( $\text{\AA}^2 \times 10^3$ ) for **14**.

|      | x       | y       | z      | U(eq) |
|------|---------|---------|--------|-------|
| H3A  | 4235(1) | 8609(1) | 528(1) | 34    |
| H4A  | 3866(1) | 5298(1) | 237(1) | 44    |
| H2A  | 1385    | 3711    | 1003   | 46    |
| H2B  | 773     | 4997    | 972    | 46    |
| H3B  | 1104    | 3676    | 1696   | 46    |
| H3C  | -170    | 4708    | 1620   | 46    |
| H4B  | 1753    | 5994    | 1831   | 37    |
| H4C  | 2605    | 4944    | 2066   | 37    |
| H5A  | 5921    | 5801    | 1310   | 27    |
| H7A  | 5669    | 3662    | 1764   | 30    |
| H9A  | 9162    | 3873    | 2679   | 43    |
| H10A | 9133    | 5817    | 2623   | 43    |
| H14A | 4257    | 7143    | 1927   | 30    |
| H15A | 7583    | 9110    | 2036   | 67    |
| H15B | 5654    | 8851    | 2147   | 67    |
| H15C | 6149    | 9272    | 1693   | 67    |
| H16A | 9063    | 7903    | 1520   | 60    |
| H16B | 7551    | 7865    | 1192   | 60    |
| H16C | 8262    | 6724    | 1386   | 60    |
| H18A | 1228    | 8869    | 941    | 34    |
| H19A | 4437    | 9942    | 1067   | 36    |
| H19B | 2970    | 10446   | 785    | 36    |
| H20A | 2607    | 10166   | 1658   | 43    |
| H21A | 4780    | 11466   | 1528   | 66    |
| H21B | 3193    | 12097   | 1727   | 66    |
| H21C | 3545    | 12189   | 1240   | 66    |
| H22A | 281     | 11400   | 1593   | 79    |
| H22B | -10     | 10294   | 1321   | 79    |
| H22C | 548     | 11441   | 1102   | 79    |
| H24A | 2978    | 7281    | -178   | 51    |

|      |      |      |      |    |
|------|------|------|------|----|
| H24B | 4701 | 7173 | 78   | 51 |
| H27A | 1757 | 3813 | -864 | 38 |
| H28A | 1938 | 1859 | -914 | 40 |
| H30A | 3839 | 1738 | 246  | 50 |
| H31A | 3659 | 3678 | 293  | 49 |

---

Table 6. Torsion angles [°] for **14**.

|                |           |                 |             |
|----------------|-----------|-----------------|-------------|
| C5-N1-C1-O1    | 7.6(4)    | C11-O2-C13-C15  | 164.6(2)    |
| C4-N1-C1-O1    | 179.7(2)  | C11-O2-C13-C14  | 46.8(3)     |
| C5-N1-C1-C2    | -172.3(2) | C17-O3-C14-C5   | 118.0(2)    |
| C4-N1-C1-C2    | -0.2(3)   | C17-O3-C14-C13  | -122.3(2)   |
| O1-C1-C2-C3    | 165.9(3)  | N1-C5-C14-O3    | -66.8(2)    |
| N1-C1-C2-C3    | -14.2(3)  | C6-C5-C14-O3    | 166.44(19)  |
| C1-C2-C3-C4    | 22.3(3)   | N1-C5-C14-C13   | 176.08(19)  |
| C1-N1-C4-C3    | 14.3(3)   | C6-C5-C14-C13   | 49.3(3)     |
| C5-N1-C4-C3    | -174.0(2) | O2-C13-C14-O3   | 179.42(19)  |
| C2-C3-C4-N1    | -22.0(3)  | C16-C13-C14-O3  | -60.0(3)    |
| C1-N1-C5-C6    | -119.0(2) | C15-C13-C14-O3  | 66.0(3)     |
| C4-N1-C5-C6    | 69.9(3)   | O2-C13-C14-C5   | -63.1(3)    |
| C1-N1-C5-C14   | 116.6(2)  | C16-C13-C14-C5  | 57.5(3)     |
| C4-N1-C5-C14   | -54.5(3)  | C15-C13-C14-C5  | -176.6(2)   |
| N1-C5-C6-C7    | 36.6(3)   | C14-O3-C17-O4   | -3.7(3)     |
| C14-C5-C6-C7   | 162.9(2)  | C14-O3-C17-C18  | 172.32(19)  |
| N1-C5-C6-C11   | -146.5(2) | C23-N3-C18-C17  | 68.3(2)     |
| C14-C5-C6-C11  | -20.2(3)  | C23-N3-C18-C19  | -171.72(17) |
| C11-C6-C7-C8   | -0.1(4)   | O4-C17-C18-N3   | -151.0(2)   |
| C5-C6-C7-C8    | 176.9(2)  | O3-C17-C18-N3   | 32.9(3)     |
| C6-C7-C8-C9    | -0.1(4)   | O4-C17-C18-C19  | 88.5(3)     |
| C6-C7-C8-C12   | -179.1(2) | O3-C17-C18-C19  | -87.6(2)    |
| C7-C8-C9-C10   | 0.0(4)    | N3-C18-C19-C20  | 177.97(19)  |
| C12-C8-C9-C10  | 179.0(3)  | C17-C18-C19-C20 | -59.8(3)    |
| C8-C9-C10-C11  | 0.2(5)    | C18-C19-C20-C21 | 167.9(2)    |
| C13-O2-C11-C6  | -18.8(4)  | C18-C19-C20-C22 | -68.3(3)    |
| C13-O2-C11-C10 | 162.3(2)  | C18-N3-C23-O5   | 3.7(3)      |
| C7-C6-C11-O2   | -178.5(2) | C18-N3-C23-C24  | -179.1(2)   |
| C5-C6-C11-O2   | 4.5(4)    | C25-N4-C24-C23  | 112.8(2)    |
| C7-C6-C11-C10  | 0.3(4)    | O5-C23-C24-N4   | -29.7(4)    |
| C5-C6-C11-C10  | -176.7(2) | N3-C23-C24-N4   | 153.1(2)    |
| C9-C10-C11-O2  | 178.5(3)  | C24-N4-C25-O6   | -0.4(3)     |
| C9-C10-C11-C6  | -0.4(4)   | C24-N4-C25-C26  | 176.8(2)    |
| C11-O2-C13-C16 | -76.1(3)  | O6-C25-C26-C27  | 13.2(4)     |

|                 |           |                 |           |
|-----------------|-----------|-----------------|-----------|
| N4-C25-C26-C27  | -164.0(2) | C27-C28-C29-Br1 | -178.6(2) |
| O6-C25-C26-C31  | -167.8(3) | C28-C29-C30-C31 | 0.8(5)    |
| N4-C25-C26-C31  | 15.0(4)   | Br1-C29-C30-C31 | 178.6(3)  |
| C31-C26-C27-C28 | 0.2(4)    | C29-C30-C31-C26 | -0.2(5)   |
| C25-C26-C27-C28 | 179.3(3)  | C27-C26-C31-C30 | -0.3(5)   |
| C26-C27-C28-C29 | 0.3(4)    | C25-C26-C31-C30 | -179.3(3) |
| C27-C28-C29-C30 | -0.8(4)   |                 |           |

---

Symmetry transformations used to generate equivalent atoms:

Table 7. Hydrogen bonds for **14** [ $\text{\AA}$  and  $^\circ$ ].

| D-H...A       | d(D-H)    | d(H...A)   | d(D...A)   | $\angle(\text{DHA})$ |
|---------------|-----------|------------|------------|----------------------|
| N3-H3A...O6#1 | 0.9100(1) | 2.143(2)   | 3.027(2)   | 163.66(5)            |
| N4-H4A...O1   | 0.9100(1) | 2.0612(18) | 2.9195(18) | 156.75(6)            |

Symmetry transformations used to generate equivalent atoms:

#1  $x+1/2, -y+3/2, -z$
